# Supplementary material
Source: PubMed Central journal article supplement (PMC4323394)

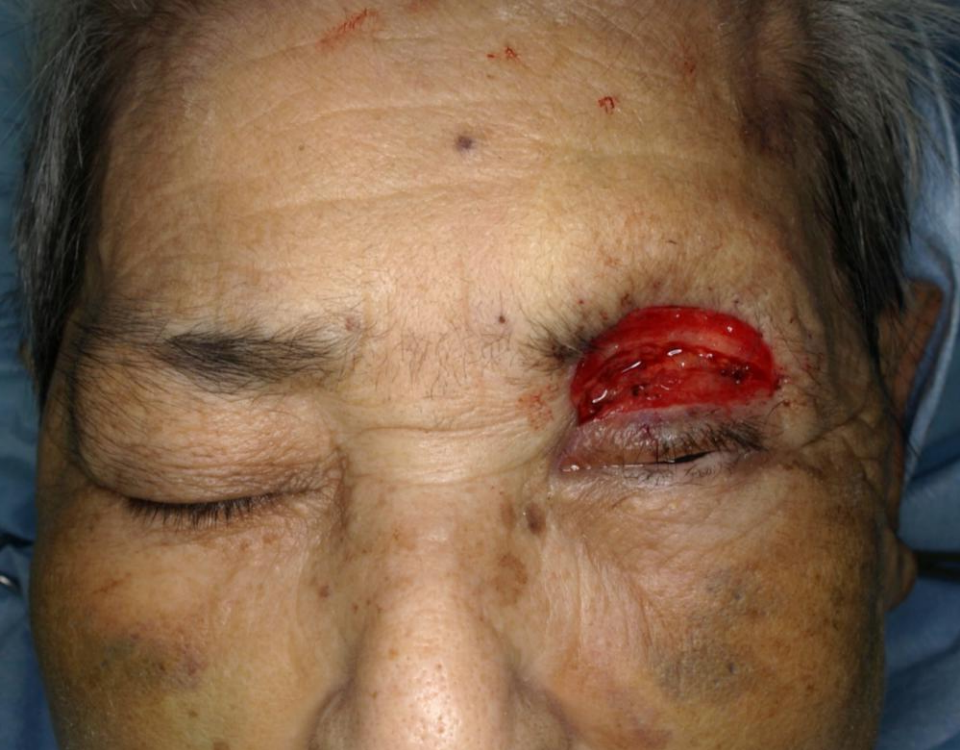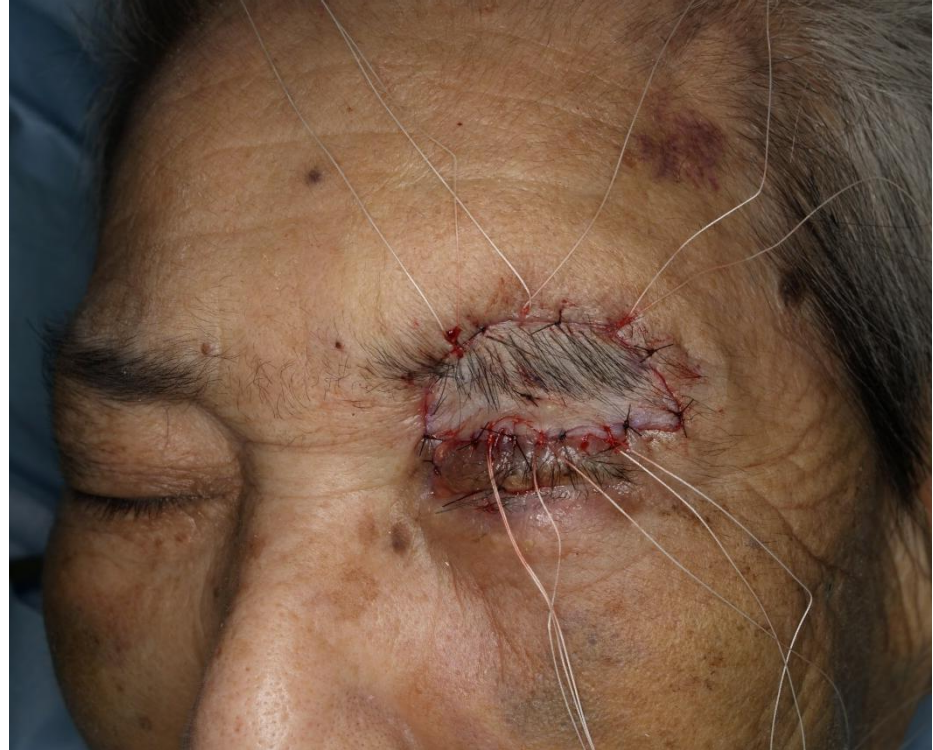

Supplement: gox-3-e290-s001.pdf [file gox-3-e290-s001.pdf]
